# Supplementary material for: Extensions of Granger Causality Calculations on Brain Networks for Efficient and Accurate Seizure Focus Identification via iEEGs
Source: MDPI journal article supplement (doi:10.3390/brainsci11091167), 2021-09-01
Supplement: s1 [file s1]

## *Supplementary Material*

### Supplementary Figures and Tables

**Table S1.** Demographic information and clinical outcomes for 25 patients included in this study's dataset

| Patient No. | Age/gender | Etiology                                                    | Pathology                                      | Resection procedure                                                                          | Engel class |
|-------------|------------|-------------------------------------------------------------|------------------------------------------------|----------------------------------------------------------------------------------------------|-------------|
| 1           | 8/F        | Cortical dysplasia of the right inferior frontal gyrus      | Gliosis and dysplastic neurons                 | Right frontal lesionectomy                                                                   | Ia          |
| 2           | 2.25/M     | Left frontal lesion                                         | FCD Type IIB, Low grade glial neoplasm         | Resection of tumor and small additional resection of cortex adjacent to the cavity           | Ia          |
| 3           | 18/F       | Unknown                                                     | Gliosis                                        | Left mesial temporal nonlesional resection                                                   | Ia          |
| 4           | 18/M       | Unknown                                                     | Gliosis                                        | Left anterior and mesial temporal resection                                                  | Ia          |
| 5           | 18/F       | Extensive bilateral heterotopia                             | FCD Type IA, Hippocampal gliosis               | Right temporal resection                                                                     | Ia          |
| 6           | 19/F       | Lesion in left superior temporal gyrus                      | WHO Grade I-II Ganglioglioma                   | Resection of tumor in the superior temporal sulcus                                           | Ia          |
| 7           | 11/M       | Unknown                                                     | FCD Type IIIA, Gliosis                         | Left anterior temporal resection and additional resection of lateral and basal seizure focus | III         |
| 8           | 10/F       | Right medial frontal DNET                                   | Recurrent/residual low-grade glioma            | Resection of parasagittal brain tumor                                                        | Ia          |
| 9           | 10/M       | Focal cortical dysplasia; Prior year left frontal resection | FCD Type IIA, Gliosis                          | Extension of prior resection, four years earlier, of a left frontal cortical dysplasia       | Ia          |
| 10          | 16/M       | Unknown                                                     | MTS, Gliosis                                   | Left anterior mesiotemporal resection                                                        | Ia          |
| 11          | 2/F        | Unknown                                                     | Microglia activation, Gliosis, Neuronal injury | Left parietal and frontal cortex resection                                                   | Ia          |
| 12          | 6/M        | Left frontal focal cortical dysplasia                       | FCD Type IIA                                   | Functional disconnection of left frontal lobe anterior to motor strip                        | Ia          |

|    |      |                                                                                                                                  |                                                                                                                                   |                                                                                            |     |
|----|------|----------------------------------------------------------------------------------------------------------------------------------|-----------------------------------------------------------------------------------------------------------------------------------|--------------------------------------------------------------------------------------------|-----|
| 13 | 20/F | Right parietal oligodendroglioma                                                                                                 | Cerebral gray and white matter with extensive reactive changes (oligodendroglioma 11 years earlier, then gliosis 4 years earlier) | No resection was done due to concern over motor deficit                                    | N/A |
| 14 | 10/M | Unknown (focal seizures, epileptic encephalopathy)                                                                               | Cortex and white matter with reactive changes                                                                                     | Right frontal resection                                                                    | Ia  |
| 15 | 16/F | Left temporo-occipital subcortical heterotopia                                                                                   | FCD Type IIA, Vascular malformation                                                                                               | Resection of seizure focus on the left side                                                | Ia  |
| 16 | 17/M | Left mesial temporal lesion                                                                                                      | FCD Type IIA, HS                                                                                                                  | Left temporal lobe and medial structures resection                                         | Ib  |
| 17 | 12/M | Left mesial temporal sclerosis, Left temporal dysplasia                                                                          | FCD Type IIA, HS, Gliosis                                                                                                         | Left mesial temporal lobe resection                                                        | Ia  |
| 18 | 13/F | Unclear: MRI scans suggest some possible cortical dysplasia in the anterior-superior temporal gyrus                              | FCD Type IIA, Gliosis                                                                                                             | Partial left temporal lobectomy                                                            | Ib  |
| 19 | 18/M | Presumed cortical dysplasia of left para-hippocampal gyrus (MTLE)                                                                | MTS, Gliosis                                                                                                                      | Left temporal tip and mesial temporal resection                                            | Ia  |
| 20 | 10/M | Right MCA in utero stroke affecting inferior frontal temporal and parietal areas with intraparenchymal cyst and encephalomalacia | FCD Type IA, Gliosis                                                                                                              | Extension of resection of right frontal cortical dysplasia (prior surgery 5 years earlier) | Ia  |
| 21 | 10/F | Right Frontal lobe lesion (medial superior)                                                                                      | FCD Type IIB                                                                                                                      | Resection of right mesial frontal lesion in the vicinity of the motor strip                | Ia  |

|    |       |                                                 |                                                  |                                                         |    |
|----|-------|-------------------------------------------------|--------------------------------------------------|---------------------------------------------------------|----|
| 22 | 18/M  | Nonlesional, left frontal                       | Irregularities of cortical development           | Left mesial frontal resection                           | Ia |
| 23 | 8.5/F | Suspected right parasagittal cortical dysplasia | Irregularities of cortical development, Gliosis  | Resection of large cortical dysplasia, duraplasty       | Ia |
| 24 | 2/M   | TSC due to a de novo TSC2 mutation              | Severe dysplasia and abnormal glioneuronal cells | Right frontal resection for multiple subcortical tubers | Ia |
| 25 | 18/F  | Presumed left frontal cortical dysplasia        | FCD Type IIB                                     | Left frontal cortical resection                         | II |

**Table S2.** Additional clinical and seizure localization data for 25 patients included in this study's dataset.

| Patient No. | Seizure Types                                                                    | Duration                           | Frequency          | Longest Seizure-Free Interval | Semiology                 | MRI                               | EEG                               |
|-------------|----------------------------------------------------------------------------------|------------------------------------|--------------------|-------------------------------|---------------------------|-----------------------------------|-----------------------------------|
| 1           | Clonic arm extension, behavioral arrest, repetitive speech                       | 20-40 secs                         | 5-10/day           | 2 yrs                         | Frontal vs. temporal lobe | R frontal inferior gyrus          | Regional, R fronto-temporal onset |
| 2           | Right arm clonic jerking, clonic facial jerks                                    | 5-10 secs in clusters              | 6-10/day (max)     | None                          | L frontal                 | L frontocentral                   | L frontocentral                   |
| 3           | Altered consciousness, purposeless movements, aphasia, lip smacking, confusion   | 1-2 mins                           |                    |                               | Non-lesional L temporal   |                                   |                                   |
| 4           | Generalized convulsive, complex partial (staring, mumbling, sucking teeth)       |                                    | 3-5/month          | 18 months                     |                           | Lesion adjacent to L temporal tip |                                   |
| 5           | Deja vu phenomenon, urinary incontinence; oral and hand automatisms, stomachache |                                    | 5/day (max)        | Few weeks                     |                           | Mostly occipital and temporal     |                                   |
| 6           | Generalized convulsive with urinary incontinence; sound distortion, fear, nausea | 20-60 secs                         | 1/day; 4-5/day max | 2 weeks                       |                           |                                   |                                   |
| 7           |                                                                                  |                                    |                    |                               |                           |                                   |                                   |
| 8           | GTC, left arm extension, head version left, entire left side stiffening          |                                    | Daily (max)        | 9 months                      |                           | Lesion R frontal lobe             |                                   |
| 9           | Whole body stiffening, with tremor/clonic                                        | Cluster of ~50 lasting 20 secs - 2 |                    | 2 yrs                         |                           |                                   |                                   |

# Supplementary Material

|    |                                                                                                                                            |                            |                                                              |                |                                       |                                                        |                                                               |
|----|--------------------------------------------------------------------------------------------------------------------------------------------|----------------------------|--------------------------------------------------------------|----------------|---------------------------------------|--------------------------------------------------------|---------------------------------------------------------------|
|    | movements of the upper and lower extremities                                                                                               | mins; prolonged 1 hour     |                                                              |                |                                       |                                                        |                                                               |
| 10 | Staring, sitting up, perioral cyanosis, stiffening, sucking of lips                                                                        |                            | 7 in 10 hrs (max)                                            | 1 month        | L temporal                            | L anterior temporal                                    | L anterior temporal                                           |
| 11 | Tongue twitching, R mouth deviation, flexion of arms, clenching of fists, urinary incontinence                                             | 30 secs - 10 mins          |                                                              |                | L hemisphere (L perisylvian)          | Non-localizing                                         | L frontal                                                     |
| 12 | Clusters of twitching of the R eyelid, hand, and leg                                                                                       | up to 1 min                | 3-4 clusters/day of 7-8 seizures each (max)                  | 1.75 yrs       | Gen & L sided                         | L frontal                                              | L sided predominance                                          |
| 13 | Simple partial seizure (L hand floppy, drops objects); simple partial -> complex partial seizure                                           | 5-10 secs (simple partial) | 2+/-week simple partial type; 0-3/month complex partial type | 2 yrs          | R hemisphere                          | R parietal lesion                                      | R frontal                                                     |
| 14 | GTC seizures, L hand, face, eye, mouth                                                                                                     | 1-2 mins                   |                                                              |                | R parasagittal, likely frontal region | Non-lesional                                           | R-sided                                                       |
| 15 | Staring, decreased responsiveness, repetitive phrases                                                                                      | 1-2 mins                   | 1-2/wk                                                       | 5 months       | Temporal                              | L temporal                                             | L temporal                                                    |
| 16 | Facial and upper body flushing, dysphagia, anxiety                                                                                         |                            | 10-15/day (max)                                              | 2-3 weeks      | L temporal                            |                                                        |                                                               |
| 17 | Stomach, stopping of movements; Neck stiffening, head turn, bilateral upper extremity stiffening and flexion                               | 15-30 secs                 | 0-5/day                                                      | Several months | L temporal                            | L mesial temporal sclerosis, dysplasia L temporal lobe | L anterior temp at LTM, L frontal / midline on ambulatory EEG |
| 18 | Déjà vu, staring, pausing, hand movements, incomprehensible speech; aphasic seizures difficulty breathing, sialorrhea, difficulty speaking | few mins to a few hours    | 4-5/week across all types                                    | 9 months       | L temporal                            | L temporal                                             | L temporal                                                    |
| 19 | Blank stare, fidgeting                                                                                                                     | 30 secs - 2 mins           | 2-3/day                                                      | 5 weeks        | Temporal, non-lateralizing            | L ant temporal / parahippocampal                       | L temporal (mid and anterior)                                 |
| 20 | GTC seizures; staring; upward eye deviation, body trembling, lip smacking                                                                  | few secs to couple mins    | 2-5 shorter ones / day; <3 longer ones / wk                  | 3 yrs          | R or non-localizing                   | R                                                      | R frontal > bilateral                                         |

|    |                                                                                                                                           |                  |                 |         |                                              |                                                                         |                                     |
|----|-------------------------------------------------------------------------------------------------------------------------------------------|------------------|-----------------|---------|----------------------------------------------|-------------------------------------------------------------------------|-------------------------------------|
| 21 | L arm tonic flexion with or without aura; sometimes spreads to other parts                                                                | 5-20 secs        | 5-6/night (max) | 2 weeks | Frontal                                      | R frontal lesion                                                        | Poorly localizing, possibly frontal |
| 22 | Twitching of R shoulder, R arm jerks, biceps twitch, gasping                                                                              | 1-6 secs         | Daily (max)     | hours   | L frontal                                    | Non-lesional                                                            | L frontocentral                     |
| 23 | Head version and eye deviation to L, L arm and leg stiffening, unresponsiveness; L sided Todd's paralysis                                 |                  | ~18/month       |         | R                                            | R parietal                                                              | R centroparietal                    |
| 24 | L arm extension, R arm flexed at elbow, hunched forward, L eye flutter; tonic component with abdominal flexion, head nod, heavy breathing | 10-120 secs      | 12/day (max)    | 1 week  | R mesial fronto-central or R lateral frontal | Multifocal, large tuber R frontal lobe                                  | R fronto-central                    |
| 25 | Gagging, coughing, facial twitching, unable to speak                                                                                      | 20 secs - 2 mins | 1-2 week        |         | Non-localizing, L perisylvian fissure        | L frontal cortical dysplasia; nonspecific R parietal signal abnormality | Non-localizing                      |

**Table S3.** Results from each trial of the centrality, PageRank, and total GC outdegree algorithms attempted. Note that there are 25 total patients for the SOZ results and 24 total patients for the others as only 1 patient did not undergo resection surgery after long-term monitoring.

| Direction     | Algorithm              | Significant Patients (SOZ) | Significant Patients (RZ) | Significant Patients ( $SOZ \cap RZ$ ) |
|---------------|------------------------|----------------------------|---------------------------|----------------------------------------|
| Forward Edges | Harmonic Centrality    | 7                          | 11                        | 5                                      |
| Reverse Edges | Harmonic Centrality    | 7                          | 11                        | 5                                      |
| Forward Edges | PageRank               | 6                          | 12                        | 9                                      |
| Reverse Edges | PageRank               | 11                         | 12                        | 6                                      |
| Forward Edges | Betweenness Centrality | 7                          | 11                        | 5                                      |
| Reverse Edges | Betweenness Centrality | 7                          | 11                        | 5                                      |
| Forward Edges | Indegree Centrality    | 10                         | 16                        | 10                                     |
| Forward Edges | Outdegree Centrality   | 13                         | 15                        | 10                                     |
| N/A           | Total GC Outdegree     | 13                         | 13                        | 9                                      |
